# Supplementary material for: TeaAS: a comprehensive database for alternative splicing in tea plants (Camellia sinensis)
Source: PubMed Central journal article supplement (PMC8215737; doi:10.1186/s12870-021-03065-8), 2021-06-21
Supplement: 12870_2021_3065_MOESM2_ESM.pdf [file 12870_2021_3065_MOESM2_ESM.pdf]

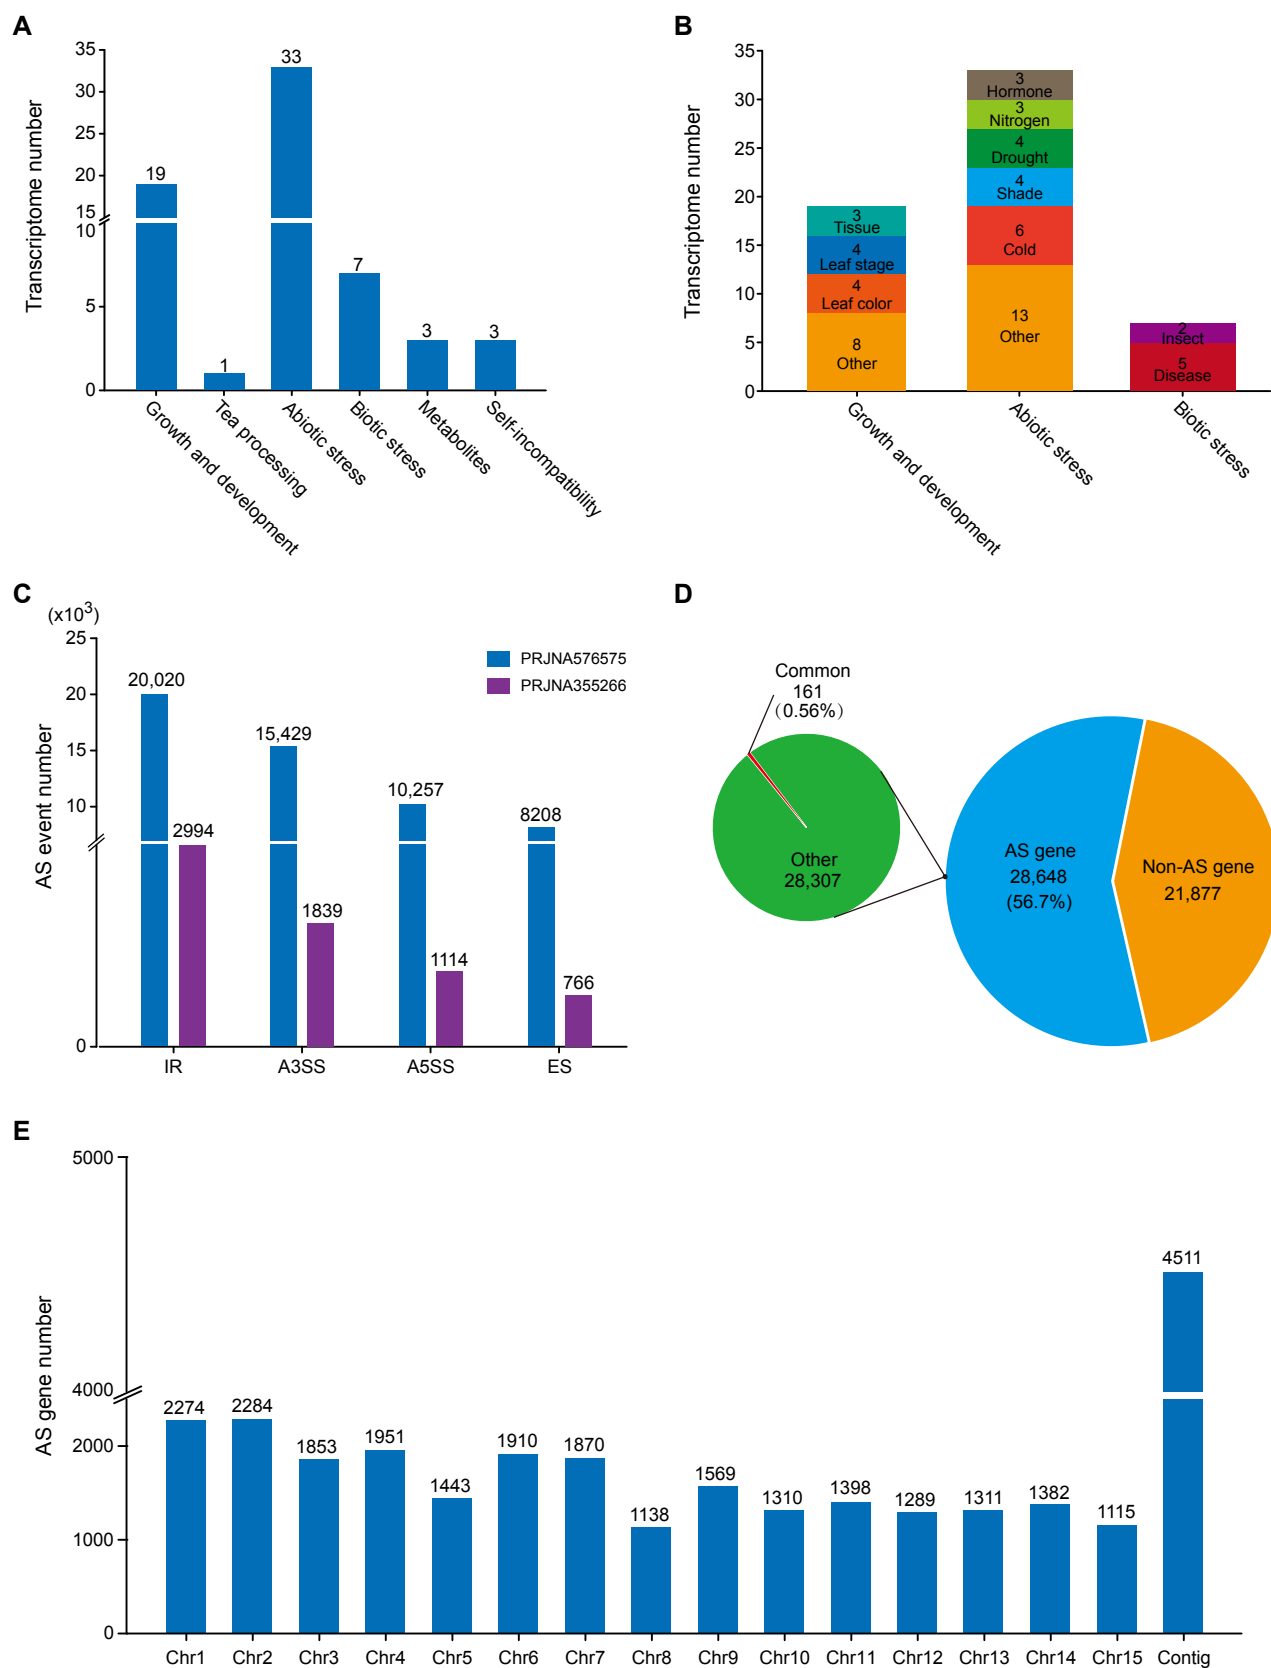

**Fig. S1** Statistics of 66 RNA-seq datasets and AS events.
